# Supplementary material for: Real-Time Observation of Capsaicin-Induced Intracellular Domain Dynamics of TRPV1 Using the Diffracted X-ray Tracking Method
Source: MDPI journal article supplement (doi:10.3390/membranes13080708), 2023-07-30
Supplement: s1 [file s1]

## Supplementary information

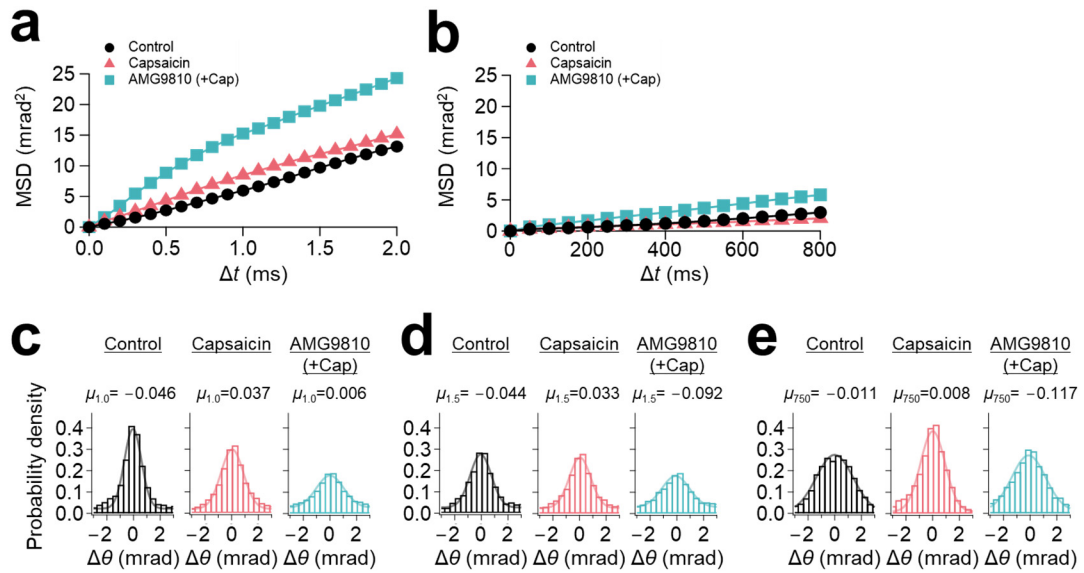

**Supplementary Figure S1. N-terminal domain movement of TRPV1 ( $\theta$  axis)**

(a) Mean square displacement (MSD) curves of TRPV1 N-terminus for the  $\theta$  axis recorded at 100  $\mu$ s/frame and (b) 12.5 ms/frame. (c) The distribution of angular displacement of short lifetime group (LT < 2.5 ms, left), (d) medium lifetime group (2.5 ms  $\leq$  LT < 4 ms) at 100  $\mu$ s/frame recording and (e) 12.5 ms/frame recording.

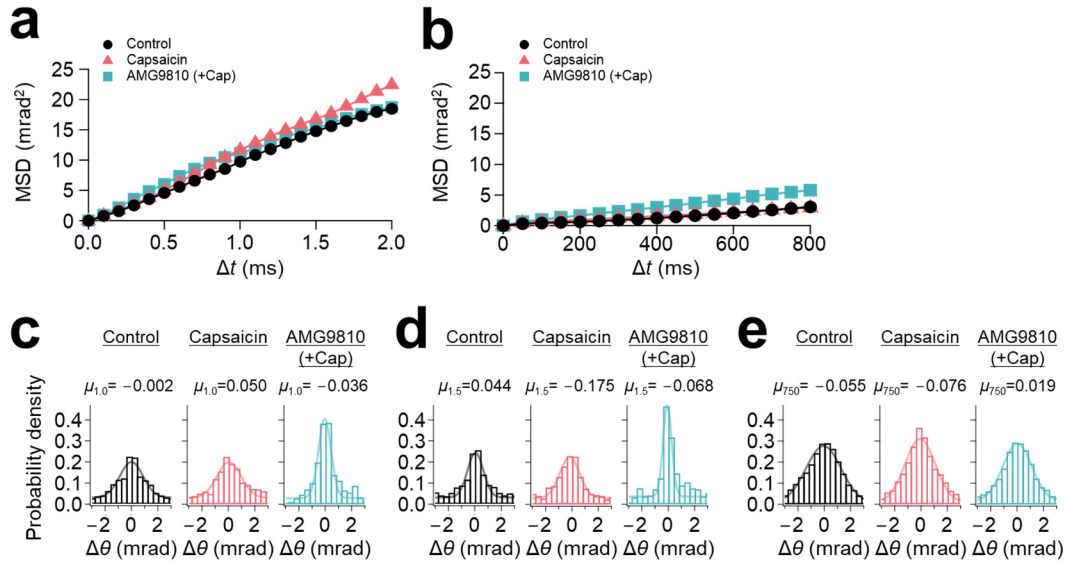

### Supplementary Figure S2. C-terminal domain movement of TRPV1 ( $\theta$ axis)

(a) Mean square displacement (MSD) curves of TRPV1 C-terminus for the  $\theta$  axis recorded at 100  $\mu$ s/frame and (b) 12.5 ms/frame. (c) The distribution of angular displacement of short lifetime group ( $LT < 2.5$  ms, left), (d) medium lifetime group ( $2.5 \text{ ms} \leq LT < 4$  ms) at 100  $\mu$ s/frame recording and (e) 12.5 ms/frame recording.

**Supplementary Table S1.** Gaussian fitting parameters for the N-terminus ( $\theta$ )

|                                                               | Control            | Capsaicin         | AMG9810 (+Cap)     |
|---------------------------------------------------------------|--------------------|-------------------|--------------------|
| LT < 2.5 ms<br>(100 $\mu$ s/frame<br>recording)               |                    |                   |                    |
| -Location (mrad)                                              | $-0.046 \pm 0.022$ | $0.037 \pm 0.025$ | $0.006 \pm 0.040$  |
| -FWHM (mrad)                                                  | $1.504 \pm 0.055$  | $1.973 \pm 0.063$ | $2.424 \pm 0.103$  |
| -Peak area                                                    | $0.598 \pm 0.020$  | $0.587 \pm 0.018$ | $0.388 \pm 0.016$  |
| 2.5 ms $\leq$ LT < 4.0 ms<br>(100 $\mu$ s/frame<br>recording) |                    |                   |                    |
| -Location (mrad)                                              | $-0.044 \pm 0.026$ | $0.033 \pm 0.028$ | $-0.092 \pm 0.044$ |
| -FWHM (mrad)                                                  | $1.873 \pm 0.065$  | $1.901 \pm 0.071$ | $2.404 \pm 0.112$  |
| -Peak area                                                    | $0.498 \pm 0.016$  | $0.478 \pm 0.017$ | $0.372 \pm 0.017$  |
| 12.5 ms/frame<br>recording                                    |                    |                   |                    |
| -Location (mrad)                                              | $-0.011 \pm 0.021$ | $0.008 \pm 0.031$ | $-0.117 \pm 0.038$ |
| -FWHM (mrad)                                                  | $3.266 \pm 0.057$  | $2.160 \pm 0.077$ | $3.004 \pm 0.100$  |
| -Peak area                                                    | $0.941 \pm 0.017$  | $0.867 \pm 0.030$ | $0.837 \pm 0.028$  |

**Supplementary Table S2.** Gaussian fitting parameters for the C-terminus ( $\theta$ )

|                                                               | Control            | Capsaicin          | AMG9810 (+Cap)     |
|---------------------------------------------------------------|--------------------|--------------------|--------------------|
| LT < 2.5 ms<br>(100 $\mu$ s/frame<br>recording)               |                    |                    |                    |
| -Location (mrad)                                              | $-0.002 \pm 0.052$ | $0.050 \pm 0.054$  | $-0.036 \pm 0.026$ |
| -FWHM (mrad)                                                  | $2.052 \pm 0.131$  | $2.156 \pm 0.137$  | $1.126 \pm 0.064$  |
| -Peak area                                                    | $0.370 \pm 0.023$  | $0.393 \pm 0.024$  | $0.451 \pm 0.023$  |
| 2.5 ms $\leq$ LT < 4.0 ms<br>(100 $\mu$ s/frame<br>recording) |                    |                    |                    |
| -Location (mrad)                                              | $0.044 \pm 0.049$  | $-0.175 \pm 0.032$ | $-0.068 \pm 0.025$ |
| -FWHM (mrad)                                                  | $1.415 \pm 0.120$  | $1.756 \pm 0.078$  | $0.782 \pm 0.062$  |
| -Peak area                                                    | $0.319 \pm 0.025$  | $0.366 \pm 0.015$  | $0.361 \pm 0.025$  |
| 12.5 ms/frame<br>recording                                    |                    |                    |                    |
| -Location (mrad)                                              | $-0.055 \pm 0.031$ | $-0.076 \pm 0.038$ | $0.019 \pm 0.028$  |
| -FWHM (mrad)                                                  | $3.153 \pm 0.081$  | $2.680 \pm 0.099$  | $2.588 \pm 0.072$  |
| -Peak area                                                    | $0.910 \pm 0.024$  | $0.864 \pm 0.032$  | $0.751 \pm 0.021$  |

**Supplementary Table 3.** Fitting parameters for the subtraction analysis (N-terminus ,  $\chi$ )

|                                                     | Peak1          | Peak2          | Peak3         | Peak4 |
|-----------------------------------------------------|----------------|----------------|---------------|-------|
| LT < 2.5 ms<br>(100 μs/frame<br>recording)          |                |                |               |       |
| -Location (mrad)                                    | -2.685 ± 0.530 | -0.037 ± 0.020 | 0.671 ± 0.864 | /     |
| -FWHM (mrad)                                        | 1.319 ± 1.475  | 1.137 ± 0.057  | 9.391 ± 1.832 |       |
| -Peak area                                          | 0.009 ± 0.011  | -0.183 ± 0.011 | 0.145 ± 0.027 |       |
| 2.5 ms ≤ LT < 4.0 ms<br>(100 μs/frame<br>recording) |                |                |               |       |
| -Location (mrad)                                    | -1.715 ± 0.090 | 0.045 ± 0.032  | 6.324 ± 0.467 | /     |
| -FWHM (mrad)                                        | 0.562 ± 0.186  | 1.030 ± 0.075  | 3.287 ± 1.230 |       |
| -Peak area                                          | 0.018 ± 0.005  | -0.101 ± 0.006 | 0.048 ± 0.014 |       |
| 12.5 ms/frame<br>recording                          |                |                |               |       |
| -Location (mrad)                                    | -0.089 ± 0.079 | 0.960 ± 1.534  | /             | /     |
| -FWHM (mrad)                                        | 2.173 ± 0.241  | 12.484 ± 5.645 |               |       |
| -Peak area                                          | 0.139 ± 0.020  | -0.126 ± 0.032 |               |       |

**Supplementary Table S4.** Fitting parameters for the subtraction analysis (C-terminus,  $\chi$ )

|                                                     | Peak1          | Peak2          | Peak3          | Peak4         |
|-----------------------------------------------------|----------------|----------------|----------------|---------------|
| LT < 2.5 ms<br>(100 μs/frame<br>recording)          |                |                |                |               |
| -Location (mrad)                                    | -7.093 ± 0.595 | -2.902 ± 0.193 | -0.280 ± 0.052 | 1.482 ± 0.101 |
| -FWHM (mrad)                                        | 2.127 ± 1.532  | 0.943 ± 0.454  | 1.083 ± 0.131  | 1.115 ± 0.255 |
| -Peak area                                          | 0.030 ± 0.018  | 0.019 ± 0.008  | -0.093 ± 0.009 | 0.050 ± 0.010 |
| 2.5 ms ≤ LT < 4.0 ms<br>(100 μs/frame<br>recording) |                |                |                |               |
| -Location (mrad)                                    | -6.616 ± 1.190 | -2.364 ± 0.147 | 0.225 ± 0.239  |               |
| -FWHM (mrad)                                        | 2.737 ± 3.145  | 0.822 ± 0.362  | 1.245 ± 0.564  |               |
| -Peak area                                          | 0.040 ± 0.037  | -0.043 ± 0.016 | -0.050 ± 0.020 |               |
| 12.5 ms/frame<br>recording                          |                |                |                |               |
| -Location (mrad)                                    | -6.971 ± 1.940 | -3.469 ± 0.698 | 4.528 ± 0.926  |               |
| -FWHM (mrad)                                        | 2.942 ± 8.866  | 2.619 ± 1.377  | 0.011 ± 0.009  |               |
| -Peak area                                          | -0.013 ± 0.036 | 0.037 ± 0.022  | 2.424 ± 2.180  |               |
